# Supplementary material for: Markov Model Predicts Changes in STH Prevalence during Control Activities Even with a Reduced Amount of Baseline Information
Source: PubMed Central journal article supplement (PMC4817985; doi:10.1371/journal.pntd.0004371), 2016-04-01
Supplement: pntd.0004371.s003.pdf [file pntd.0004371.s003.pdf]

S3 Additional file

**Standard Transition Probability Matrix Sets developed for use in Markov Model**

Each TPMS correspond to a different intervention

Each TPMS is presented in a different page of this document

Each TPMS contains three TP matrices (one matrix for each STH species).

**Summary**

|                | 1st round        | 2nd round       |
|----------------|------------------|-----------------|
| <b>TPMS 1</b>  | albendazole      | albendazole     |
| <b>TPMS 2</b>  | mebendazole      | mebendazole     |
| <b>TPMS 3</b>  | albendazole      | No intervention |
| <b>TPMS 4</b>  | mebendazole      | No intervention |
| <b>TPMS 5</b>  | Albendazole+ IVR | albendazole     |
| <b>TPMS 6</b>  | Albendazole+ IVR | mebendazole     |
| <b>TPMS 7</b>  | Albendazole+ DEC | albendazole     |
| <b>TPMS 8</b>  | Albendazole+ DEC | mebendazole     |
| <b>TPMS 9</b>  | Albendazole+ IVR | No intervention |
| <b>TPMS 10</b> | Albendazole+ DEC | No intervention |

**TPMS            1        1st round    ALB    2nd rounc    ALB**

*Ascaris lumbricoides*

|     | CS1    | CS2    | CS3    | CS4    |
|-----|--------|--------|--------|--------|
| CS1 | 0.8110 | 0.1170 | 0.0720 | 0.0000 |
| CS2 | 0.4300 | 0.3900 | 0.1800 | 0.0000 |
| CS3 | 0.3700 | 0.4800 | 0.1500 | 0.0000 |
| CS4 | 1.0000 | 0.0000 | 0.0000 | 0.0000 |

*Trichuris trichiura*

|     | CS1    | CS2    | CS3    | CS4    |
|-----|--------|--------|--------|--------|
| CS1 | 0.6271 | 0.2926 | 0.0803 | 0.0000 |
| CS2 | 0.5101 | 0.4096 | 0.0803 | 0.0000 |
| CS3 | 0.2544 | 1.2040 | 0.0504 | 0.0000 |
| CS4 | 1.0000 | 0.0000 | 0.0000 | 0.0000 |

Hookworms

|     | CS1    | CS2    | CS3    | CS4    |
|-----|--------|--------|--------|--------|
| CS1 | 0.7250 | 0.2200 | 0.0550 | 0.0000 |
| CS2 | 0.6540 | 0.3240 | 0.0220 | 0.0000 |
| CS3 | 0.1500 | 0.7700 | 0.0800 | 0.0000 |
| CS4 | 1.0000 | 0.0000 | 0.0000 | 0.0000 |

TPMS            2    1st round    MEB    2nd round    MEB

*Ascaris lumbricoides*

|     | CS1     | CS2     | CS3     | CS4     |
|-----|---------|---------|---------|---------|
| CS1 | 0.8110  | 0.1170  | 0.0720  | 0.0000  |
| CS2 | 0.4300  | 0.3900  | 0.1800  | 0.0000  |
| CS3 | 0.3700  | 0.4800  | 0.1500  | 0.0000  |
| CS4 | 1.0000  | 0.0000  | 0.0000  | 0.0000  |
|     | CS1-CS2 | CS1-CS3 | CS2-CS2 | CS3-CS2 |

*Trichuris trichiura*

|     | CS1      | CS2    | CS3    | CS4    |
|-----|----------|--------|--------|--------|
| CS1 | 0.7040   | 0.1756 | 0.1204 | 0.0000 |
| CS2 | 0.5101   | 0.4096 | 0.0803 | 0.0000 |
| CS3 | (0.0035) | 0.9632 | 0.0403 | 0.0000 |
| CS4 | 1.0000   | 0.0000 | 0.0000 | 0.0000 |

Hookworms

|     | CS1      | CS2    | CS3    | CS4    |
|-----|----------|--------|--------|--------|
| CS1 | 0.7030   | 0.2200 | 0.0770 | 0.0000 |
| CS2 | 0.5510   | 0.4050 | 0.0440 | 0.0000 |
| CS3 | (0.1700) | 1.0500 | 0.1200 | 0.0000 |
| CS4 | 1.0000   | 0.0000 | 0.0000 | 0.0000 |

**TPMS            3        1st round    ALB    2nd round No intervention**

*Ascaris lumbricoides*

|     | CS1    | CS2    | CS3    | CS4    |
|-----|--------|--------|--------|--------|
| CS1 | 0.9530 | 0.0230 | 0.0240 | 0.0000 |
| CS2 | 0.7100 | 0.2300 | 0.0600 | 0.0000 |
| CS3 | 0.6650 | 0.2600 | 0.0750 | 0.0000 |
| CS4 | 1.0000 | 0.0000 | 0.0000 | 0.0000 |

*Trichuris trichiura*

|     | CS1    | CS2    | CS3    | CS4    |
|-----|--------|--------|--------|--------|
| CS1 | 0.8044 | 0.1476 | 0.0480 | 0.0000 |
| CS2 | 0.6650 | 0.2870 | 0.0480 | 0.0000 |
| CS3 | 0.2850 | 0.6400 | 0.0750 | 0.0000 |
| CS4 | 1.0000 | 0.0000 | 0.0000 | 0.0000 |

Hookworms

|     | CS1    | CS2    | CS3    | CS4    |
|-----|--------|--------|--------|--------|
| CS1 | 0.9706 | 0.0110 | 0.0184 | 0.0000 |
| CS2 | 0.8788 | 0.1139 | 0.0074 | 0.0000 |
| CS3 | 0.6800 | 0.2860 | 0.0340 | 0.0000 |
| CS4 | 1.0000 | 0.0000 | 0.0000 | 0.0000 |

**TPMS 4 1st round MEB 2nd round No intervention**

*Ascaris lumbricoides*

|     | CS1    | CS2    | CS3    | CS4    |
|-----|--------|--------|--------|--------|
| CS1 | 0.9530 | 0.0230 | 0.0240 | 0.0000 |
| CS2 | 0.7100 | 0.2300 | 0.0600 | 0.0000 |
| CS3 | 0.6650 | 0.2600 | 0.0750 | 0.0000 |
| CS4 | 1.0000 | 0.0000 | 0.0000 | 0.0000 |

*Trichuris trichiura*

|     | CS1    | CS2    | CS3    | CS4    |
|-----|--------|--------|--------|--------|
| CS1 | 0.9535 | 0.0364 | 0.0101 | 0.0000 |
| CS2 | 0.8989 | 0.0910 | 0.0101 | 0.0000 |
| CS3 | 0.8633 | 0.1280 | 0.0088 | 0.0000 |
| CS4 | 1.0000 | 0.0000 | 0.0000 | 0.0000 |

Hookworms

|     | CS1    | CS2    | CS3    | CS4    |
|-----|--------|--------|--------|--------|
| CS1 | 0.9010 | 0.0440 | 0.0550 | 0.0000 |
| CS2 | 0.7028 | 0.2752 | 0.0220 | 0.0000 |
| CS3 | 0.1500 | 0.7700 | 0.0800 | 0.0000 |
| CS4 | 1.0000 | 0.0000 | 0.0000 | 0.0000 |

**TPMS 5 1st round ALB+IVR 2nd round ALB**

*Ascaris lumbricoides*

|     | CS1    | CS2    | CS3    | CS4    |
|-----|--------|--------|--------|--------|
| CS1 | 0.8680 | 0.0780 | 0.0540 | 0.0000 |
| CS2 | 0.4300 | 0.3900 | 0.1800 | 0.0000 |
| CS3 | 0.3700 | 0.4800 | 0.1500 | 0.0000 |
| CS4 | 1.0000 | 0.0000 | 0.0000 | 0.0000 |

*Trichuris trichiura*

|     | CS1    | CS2    | CS3    | CS4    |
|-----|--------|--------|--------|--------|
| CS1 | 0.9640 | 0.0260 | 0.0100 | 0.0000 |
| CS2 | 0.8990 | 0.0910 | 0.0100 | 0.0000 |
| CS3 | 0.8740 | 0.1208 | 0.0052 | 0.0000 |
| CS4 | 1.0000 | 0.0000 | 0.0000 | 0.0000 |

Hookworms

|     | CS1    | CS2    | CS3    | CS4    |
|-----|--------|--------|--------|--------|
| CS1 | 0.7580 | 0.1980 | 0.0440 | 0.0000 |
| CS2 | 0.6540 | 0.3240 | 0.0220 | 0.0000 |
| CS3 | 0.2200 | 0.7000 | 0.0800 | 0.0000 |
| CS4 | 1.0000 | 0.0000 | 0.0000 | 0.0000 |

**TPMS            6            1st round ALB+IVR 2nd rounc    MEB**

*Ascaris lumbricoides*

|     | CS1    | CS2    | CS3    | CS4    |
|-----|--------|--------|--------|--------|
| CS1 | 0.8680 | 0.0780 | 0.0540 | 0.0000 |
| CS2 | 0.4300 | 0.3900 | 0.1800 | 0.0000 |
| CS3 | 0.3700 | 0.4800 | 0.1500 | 0.0000 |
| CS4 | 1.0000 | 0.0000 | 0.0000 | 0.0000 |

*Trichuris trichiura*

|     | CS1    | CS2    | CS3    | CS4    |
|-----|--------|--------|--------|--------|
| CS1 | 0.8831 | 0.0729 | 0.0440 | 0.0000 |
| CS2 | 0.6725 | 0.2835 | 0.0440 | 0.0000 |
| CS3 | 0.4000 | 0.5600 | 0.0400 | 0.0000 |
| CS4 | 1.0000 | 0.0000 | 0.0000 | 0.0000 |

Hookworms

|     | CS1    | CS2    | CS3    | CS4    |
|-----|--------|--------|--------|--------|
| CS1 | 0.7360 | 0.2200 | 0.0440 | 0.0000 |
| CS2 | 0.6540 | 0.3240 | 0.0220 | 0.0000 |
| CS3 | 0.2200 | 0.7000 | 0.0800 | 0.0000 |
| CS4 | 1.0000 | 0.0000 | 0.0000 | 0.0000 |

**TPMS 7 1st round ALB+DEC 2nd round ALB**

*Ascaris lumbricoides*

|     | CS1    | CS2    | CS3    | CS4    |
|-----|--------|--------|--------|--------|
| CS1 | 0.8680 | 0.0780 | 0.0540 | 0.0000 |
| CS2 | 0.4300 | 0.3900 | 0.1800 | 0.0000 |
| CS3 | 0.3700 | 0.4800 | 0.1500 | 0.0000 |
| CS4 | 1.0000 | 0.0000 | 0.0000 | 0.0000 |

*Trichuris trichiura*

|     | CS1    | CS2    | CS3    | CS4    |
|-----|--------|--------|--------|--------|
| CS1 | 0.8831 | 0.0729 | 0.0440 | 0.0000 |
| CS2 | 0.6725 | 0.2835 | 0.0440 | 0.0000 |
| CS3 | 0.4000 | 0.5600 | 0.0400 | 0.0000 |
| CS4 | 1.0000 | 0.0000 | 0.0000 | 0.0000 |

Hookworms

|     | CS1    | CS2    | CS3    | CS4    |
|-----|--------|--------|--------|--------|
| CS1 | 0.7360 | 0.2200 | 0.0440 | 0.0000 |
| CS2 | 0.6540 | 0.3240 | 0.0220 | 0.0000 |
| CS3 | 0.2200 | 0.7000 | 0.0800 | 0.0000 |
| CS4 | 1.0000 | 0.0000 | 0.0000 | 0.0000 |



**TPMS 8 1st round ALB+DEC 2nd round MEB**

*Ascaris lumbricoides*

|     | CS1    | CS2    | CS3    | CS4    |
|-----|--------|--------|--------|--------|
| CS1 | 0.8680 | 0.0780 | 0.0540 | 0.0000 |
| CS2 | 0.4300 | 0.3900 | 0.1800 | 0.0000 |
| CS3 | 0.3700 | 0.4800 | 0.1500 | 0.0000 |
| CS4 | 1.0000 | 0.0000 | 0.0000 | 0.0000 |

*Trichuris trichiura*

|     | CS1    | CS2    | CS3    | CS4    |
|-----|--------|--------|--------|--------|
| CS1 | 0.9640 | 0.0260 | 0.0100 | 0.0000 |
| CS2 | 0.8990 | 0.0910 | 0.0100 | 0.0000 |
| CS3 | 0.8740 | 0.1208 | 0.0052 | 0.0000 |
| CS4 | 1.0000 | 0.0000 | 0.0000 | 0.0000 |

Hookworms

|     | CS1    | CS2    | CS3    | CS4    |
|-----|--------|--------|--------|--------|
| CS1 | 0.7360 | 0.2200 | 0.0440 | 0.0000 |
| CS2 | 0.6540 | 0.3240 | 0.0220 | 0.0000 |
| CS3 | 0.2200 | 0.7000 | 0.0800 | 0.0000 |
| CS4 | 1.0000 | 0.0000 | 0.0000 | 0.0000 |

**TPMS 9 1st round ALB+IVR 2nd round No Intervention**

*Ascaris lumbricoides*

|     | CS1    | CS2    | CS3    | CS4    |
|-----|--------|--------|--------|--------|
| CS1 | 0.8929 | 0.0351 | 0.0720 | 0.0000 |
| CS2 | 0.4300 | 0.3900 | 0.1800 | 0.0000 |
| CS3 | 0.3700 | 0.4800 | 0.1500 | 0.0000 |
| CS4 | 1.0000 | 0.0000 | 0.0000 | 0.0000 |

*Trichuris trichiura*

|     | CS1    | CS2    | CS3    | CS4    |
|-----|--------|--------|--------|--------|
| CS1 | 0.9535 | 0.0364 | 0.0101 | 0.0000 |
| CS2 | 0.8989 | 0.0910 | 0.0101 | 0.0000 |
| CS3 | 0.8633 | 0.1280 | 0.0088 | 0.0000 |
| CS4 | 1.0000 | 0.0000 | 0.0000 | 0.0000 |

Hookworms

|     | CS1    | CS2    | CS3    | CS4    |
|-----|--------|--------|--------|--------|
| CS1 | 0.9706 | 0.0110 | 0.0184 | 0.0000 |
| CS2 | 0.8788 | 0.1139 | 0.0074 | 0.0000 |
| CS3 | 0.6800 | 0.2860 | 0.0340 | 0.0000 |
| CS4 | 1.0000 | 0.0000 | 0.0000 | 0.0000 |

**TPMS 10 1st round ALB+DEC 2nd round No intervention**

*Ascaris lumbricoides*

|     | CS1    | CS2    | CS3    | CS4    |
|-----|--------|--------|--------|--------|
| CS1 | 0.8968 | 0.0312 | 0.0720 | 0.0000 |
| CS2 | 0.4300 | 0.3900 | 0.1800 | 0.0000 |
| CS3 | 0.3700 | 0.4800 | 0.1500 | 0.0000 |
| CS4 | 1.0000 | 0.0000 | 0.0000 | 0.0000 |

*Trichuris trichiura*

|     | CS1    | CS2    | CS3    | CS4    |
|-----|--------|--------|--------|--------|
| CS1 | 0.8588 | 0.0972 | 0.0440 | 0.0000 |
| CS2 | 0.6725 | 0.2835 | 0.0440 | 0.0000 |
| CS3 | 0.3900 | 0.5600 | 0.0500 | 0.0000 |
| CS4 | 1.0000 | 0.0000 | 0.0000 | 0.0000 |

Hookworms

|     | CS1    | CS2    | CS3    | CS4    |
|-----|--------|--------|--------|--------|
| CS1 | 0.9128 | 0.0327 | 0.0545 | 0.0000 |
| CS2 | 0.6546 | 0.3236 | 0.0218 | 0.0000 |
| CS3 | 0.1650 | 0.7590 | 0.0760 | 0.0000 |
| CS4 | 1.0000 | 0.0000 | 0.0000 | 0.0000 |
